# Supplementary material for: Accelerated Weathering Increases the Release of Toxic Leachates from Microplastic Particles as Demonstrated through Altered Toxicity to the Green Algae Raphidocelis subcapitata
Source: Toxics. 2021 Aug 5;9(8):185. doi: 10.3390/toxics9080185 (PMC8402562; doi:10.3390/toxics9080185)
Supplement: Supplementary file 1 [file toxics-09-00185-s001.zip › toxics-1304736-supplementary.pdf]

# Supplementary Materials: Accelerated Weathering Increases the Release of Toxic Leachates from Microplastic Particles as Demonstrated through Altered Toxicity to the Green Algae *Raphidocelis subcapitata*

Márta Simon, Nanna B. Hartmann and Jes Vollertsen

**Table S1.** Composition of the algae growth medium.

|                                                      |     |      |
|------------------------------------------------------|-----|------|
| NH <sub>4</sub> Cl                                   | 15  | mg/L |
| MgCl <sub>2</sub> .6 H <sub>2</sub> O                | 12  | mg/L |
| CaCl <sub>2</sub> .7 H <sub>2</sub> O                | 18  | mg/L |
| MgSO <sub>4</sub> .7 H <sub>2</sub> O                | 15  | mg/L |
| KH <sub>2</sub> PO <sub>4</sub>                      | 1.6 | mg/L |
| FeCl <sub>3</sub> .6 H <sub>2</sub> O                | 64  | µg/L |
| Na <sub>2</sub> EDTA                                 | 100 | µg/L |
| H <sub>3</sub> BO <sub>4</sub>                       | 185 | µg/L |
| MnCl <sub>2</sub> .4 H <sub>2</sub> O                | 415 | µg/L |
| ZnCl <sub>2</sub>                                    | 3   | µg/L |
| CoCl <sub>2</sub> .6 H <sub>2</sub> O                | 1.5 | µg/L |
| CuCl <sub>2</sub> .2 H <sub>2</sub> O                | 0.1 | µg/L |
| Na <sub>2</sub> MoO <sub>4</sub> .2 H <sub>2</sub> O | 7   | µg/L |
| NaHCO <sub>3</sub>                                   | 50  | mg/L |

**Table S2.** Growth rates of blank samples. The growth medium was agitated at 20 °C for 72 hours. Afterwards, the samples were filtered through a 0.45 µm syringe filter and kept frozen at −20 °C for a couple of days, prior to the growth inhibition tests.

| Sample  |   | Growth rate |
|---------|---|-------------|
| Blank 1 | 1 | 1.17        |
|         | 2 | 1.15        |
|         | 3 | 1.15        |
| Blank 2 | 1 | 1.22        |
|         | 2 | 1.38        |
|         | 3 | 1.32        |
| Blank 3 | 1 | 1.26        |
|         | 2 | 1.32        |
|         | 3 | 1.31        |

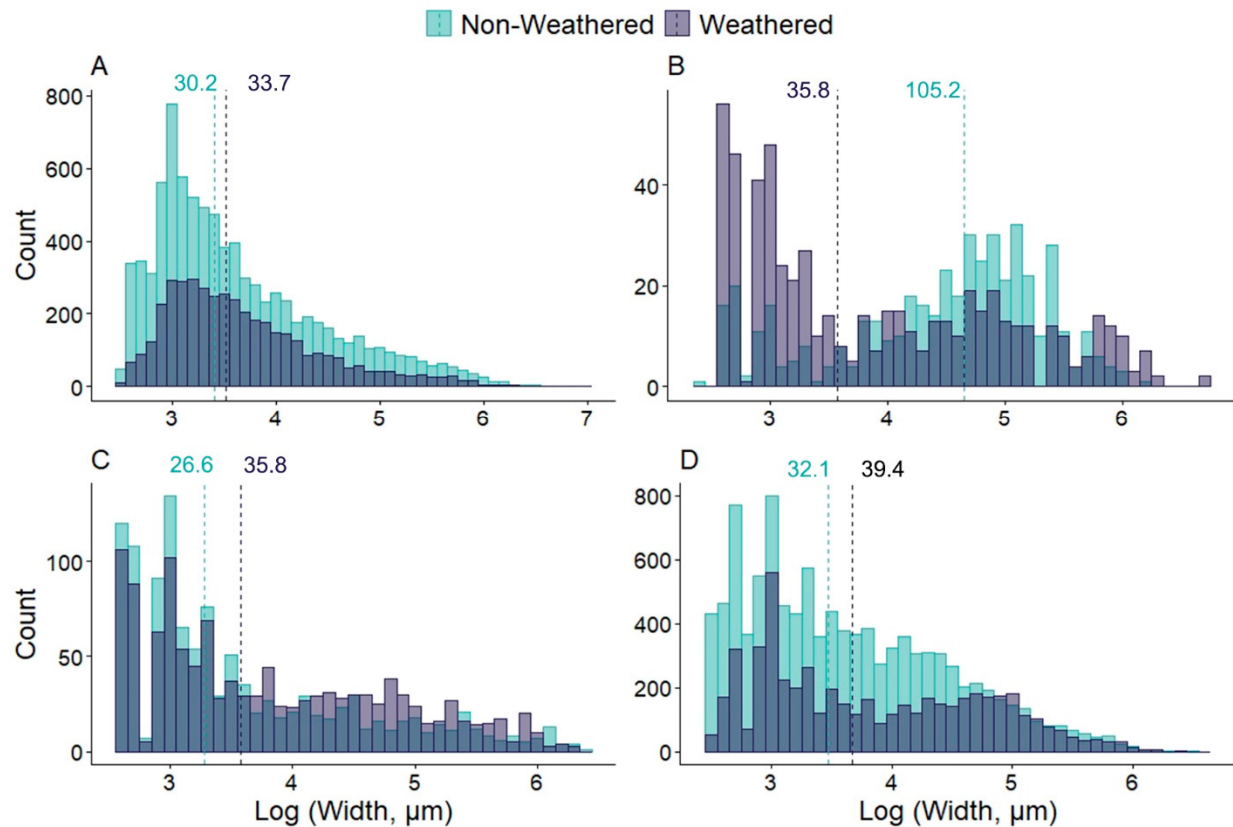

**Figure S1.** Distribution of the width of non-weathered and weathered paint mix (A), zinc paint (B), tire (C) and PVC (D) microparticles applied in the growth inhibition tests. The size of the bins was 0.1 on a logarithmic scale. The width is defined as the minimum Feret diameter, and the median values in micrometre are denoted.

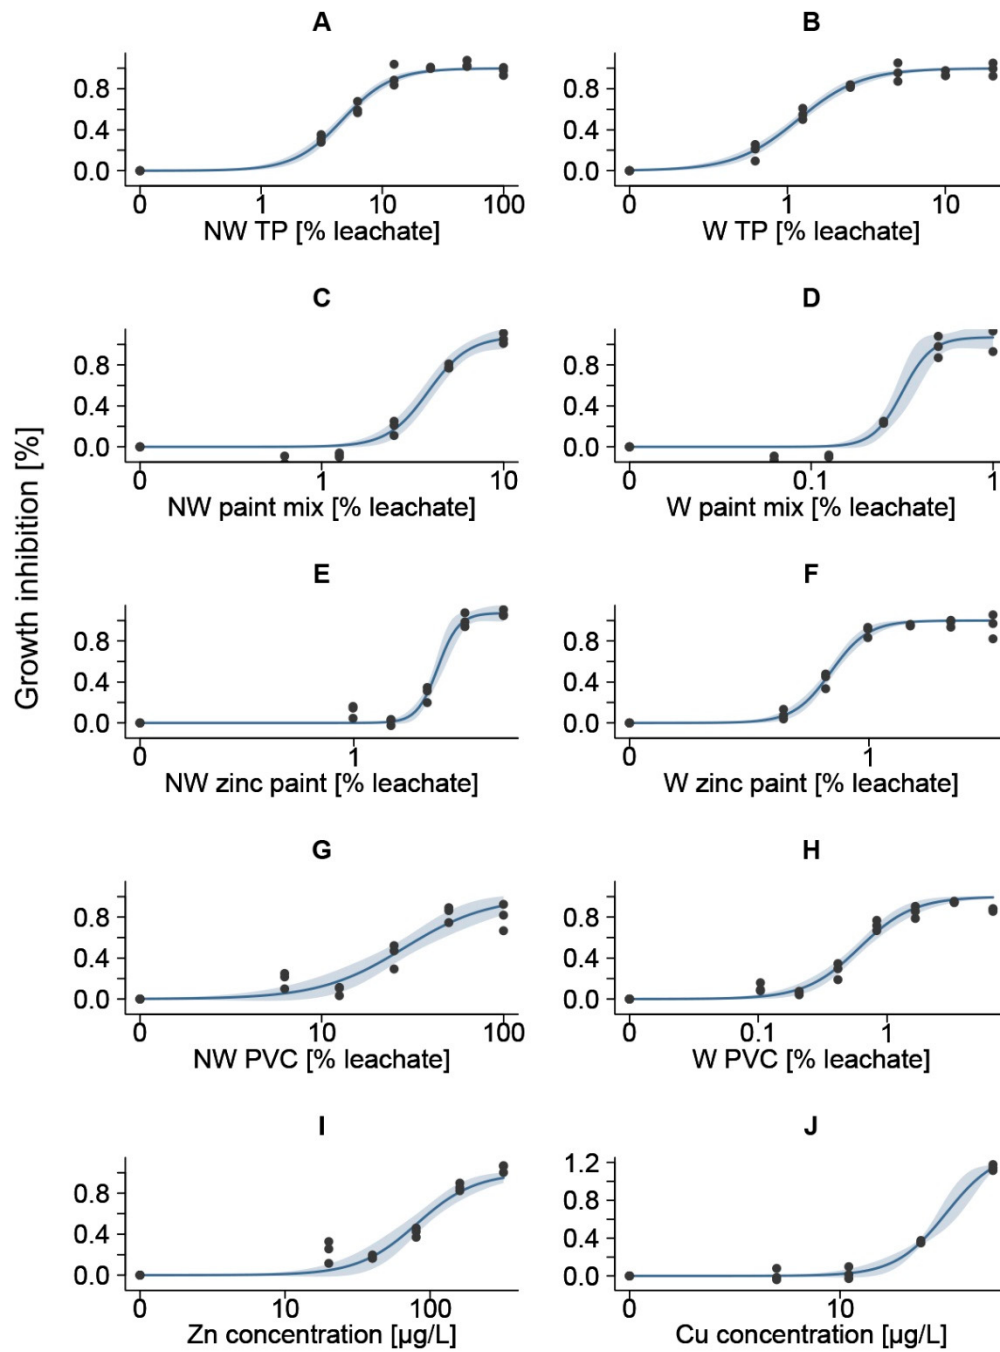

**Figure S2.** Log-logistic concentration-response profiles of particle leachates, including 95% confidence interval.
